1 Prospective study of ***Candida auris* nucleic-acids in wastewater solids in 190 wastewater**  
2 **treatment plants in the United States suggests widespread occurrence**

3

4 **Alessandro Zulli<sup>1</sup>, Elana M. G. Chan<sup>1</sup>, Bridgette Shelden<sup>2</sup>, Dorothea Duong<sup>2</sup>, Xiang-Ru S.**  
5 **Xu<sup>2</sup>, Bradley J. White<sup>2</sup>, Marlene K. Wolfe<sup>3</sup>, Alexandria B. Boehm<sup>1\*</sup>**

6

7 1. Department of Civil and Environmental Engineering, Stanford University, 473 Via Ortega,  
8 Stanford, California, 94305

9 2. Verily Life Sciences LLC, South San Francisco, CA, USA

10 3. Gangarosa Department of Environmental Health, Rollins School of Public Health, Emory  
11 University, 1518 Clifton Rd, Atlanta, GA, USA, 30322

12

13 \* Corresponding author: [aboehm@stanford.edu](mailto:aboehm@stanford.edu)

14

15

16

17 **Abstract**

18

19 *Candida auris* is an emerging, multidrug-resistant fungal pathogen that poses a significant  
20 public health threat in healthcare settings. Despite yearly clinical cases rapidly increasing from  
21 77 to 8,131 in the last decade, surveillance data on its distribution and prevalence remains  
22 limited. We implemented a novel assay for *C. auris* detection on a nationwide scale  
23 prospectively from September 2023 to March 2024, analyzing a total of 13,842 samples from  
24 190 wastewater treatment plants across 41 U.S. states. Assays were extensively validated  
25 through comparison to other known assays and internal controls. Of these 190 wastewater  
26 treatment plants, *C. auris* was detected in the wastewater solids of 65 of them (34.2%) with  
27 1.45% of all samples having detectable levels of *C. auris*. Detections varied seasonally, with  
28 2.00% of samples positive in autumn versus 1.01% in winter ( $p < 0.0001$ ). The frequency of  
29 detection in wastewater was significantly associated with states having older populations  
30 ( $p < 0.001$ ), sewersheds containing more hospitals ( $p < 0.0001$ ), and sewersheds containing more  
31 nursing homes ( $p < 0.001$ ). These associations are in agreement with known *C. auris*  
32 epidemiology. This nationwide study demonstrates the viability of wastewater surveillance for *C.*  
33 *auris* surveillance, and further highlights the value of wastewater surveillance when clinical  
34 testing is constrained.

35

36

37 **Introduction**

38 Healthcare associated infections are rapidly emerging as a global public health threat due to  
39 increasing levels of antimicrobial resistance and an aging worldwide population (1–3). Among  
40 these infections, *Candida auris*, first identified in 2009 in Japan, is an opportunistic, drug-  
41 resistant fungal pathogen with significant levels of associated morbidity and mortality (3–6). It  
42 has now spread to over 40 countries and has been designated as a priority pathogen by both  
43 international organizations, such as the World Health Organization (WHO), and national  
44 organizations, such as the Center for Disease Control and Prevention (CDC) in the United  
45 States, where it is now a nationally notifiable condition (4, 6, 7). The estimated crude mortality  
46 rate within the United States for *C. auris* infections was 34% between 2017-2022 (5).

47

48 *C. auris* prevention and control efforts are exacerbated by the fungus' hardiness on fomites and  
49 high levels of transmissibility (6–8). The fungus has been found to persist for at least 7 days on  
50 both moist and dry surfaces, increasing the frequency and chance of transmission events in  
51 healthcare settings (9, 10). Of particular concern are high-touch plastic surfaces within  
52 healthcare facilities where *C. auris* was found to be viable for up to 14 days (10). In addition, *C.*  
53 *auris* is resistant to many common disinfectants so proper decontamination protocols are  
54 difficult and time intensive in already strained healthcare facilities (11). Further complicating  
55 containment efforts are the different presentations in colonized individuals compared to those  
56 with acute infections, with most colonized individuals presenting as asymptomatic (4). A lack of  
57 screening in high-risk patients and misidentification of specimens as other *Candida* subspecies  
58 has also contributed to the rapid spread of *C. auris* (5, 12). In the United States, clinical cases  
59 rose from 77 between 2013-2016 to 8,131 in 2022 and are projected to continue rising (5, 13).

60

61 Despite this tremendous increase in cases and the accompanying screening efforts, clinically  
62 available data are still sparse, with many institutions not speciating *Candida* cases resulting in  
63 underreporting cases in long-term care facilities and nursing homes (13, 14). Many of these  
64 facilities do not have the necessary equipment or human capital to implement speciation efforts  
65 and screening, which has been shown to be a necessary part of successful containment efforts  
66 (12). Alternative approaches to clinical surveillance are therefore necessary to better track both  
67 the spread and severity of outbreaks. Wastewater represents a naturally composite sample  
68 which is particularly useful for disease surveillance as it contains urine, feces, vomit, saliva,  
69 sloughed skin cells, sputum, and other excretions. Wastewater surveillance has been  
70 successfully used to track a wide variety of human pathogens including enterovirus, SARS-CoV-  
71 2, influenza A virus, and flavivirus (15–17). Like these viruses, *C. auris* has been detected in  
72 urine and stool samples from colonized or infected individuals, though it is typically diagnosed

73 through presence in the blood or dermis of infected patients (4, 10, 18). Furthermore, recent  
74 studies have demonstrated the persistence and subsequent detection of *C. auris* in wastewater  
75 samples in Nevada and Florida (19). Early detection of this emerging pathogen through  
76 environmental surveillance may complement clinical surveillance efforts and inform containment  
77 and screening procedures (20).

78  
79 In this paper, we present the results of a United States-wide wastewater monitoring effort for *C.*  
80 *auris* and compare the data to publicly available, recent, clinical case data. We also compare  
81 results to available demographic indicators and healthcare facility locations. Detections of *C.*  
82 *auris* in wastewater demonstrate wide geographical occurrence, and we demonstrate that these  
83 wastewater detections appear to be associated with age and presence of hospitals and nursing  
84 homes in adjacent communities. These results demonstrate the advantages of using  
85 wastewater surveillance for the detection of emerging pathogens and for supplementing clinical  
86 testing efforts.

87

## 88 **Methods**

89

90 **RT-PCR assays.** We designed a novel probe for *Candida auris* to use in conjunction with  
91 previously published specific and sensitive forward and reverse primers (21). The assay targets  
92 the region of the genome encoding the 5.8S ribosomal RNA, all of ITS2, and a fragment of 28S  
93 ribosomal RNA. To design the probe, *C. auris* genome sequences were downloaded from the  
94 National Center for Biotechnology Information (NCBI) and aligned to identify conserved regions  
95 located between the primers. The probe was designed *in silico* using Primer3Plus  
96 (<https://primer3plus.com/>). Parameters used in the design process (e.g., sequence length, GC  
97 content, and melt temperatures) are provided in Table S1. The primers and probe were then  
98 screened for specificity *in silico* by blasting the sequences in NCBI and *in vitro* against fungal

99 panels, or cDNA sequences. The *in silico* analysis was performed by excluding all *C. auris*  
100 genomes from a BLAST search, thereby only giving off-target matches (22).

101  
102 The primers and probe were tested *in vitro* for specificity and sensitivity using a fungal panel  
103 (NATCTVPOS-BD, Zeptomatrix Buffalo, NY) and *Candida auris* Satoh et Makimura (ATCC  
104 MYA-5001) purchased from American Type Culture Collection (ATCC, Manassas, VA). The  
105 fungal panel NATCTVPOS-BD includes chemically inactivated *Candida albicans*, *C. krusei*, *C.*  
106 *glabrata*, and *Trichomoniasis vaginalis*. Nucleic acids were extracted from fungi using Chemagic  
107 Viral DNA/RNA 300 Kit H96 for Chemagic 360 (PerkinElmer, Waltham, MA).

108  
109 Nucleic acids were used undiluted as template in digital droplet RT-PCR (ddRT-PCR) singleton  
110 assays for sensitivity and specificity testing in single wells. The concentration of targets used in  
111 the *in vitro* specificity testing was between  $10^3$  and  $10^4$  copies per well. Negative RT-PCR  
112 controls were included on each plate.

113  
114 We used an RT-PCR assay for the *in vitro* sensitivity and specificity testing as the goal was to  
115 ultimately multiplex the *C. auris* assay in a panel that includes RNA-genome viruses. The  
116 implications of the use of RT-PCR, and a comparison to results obtained using PCR are further  
117 investigated, as described below. Regardless, this means the assay detects both DNA and RNA  
118 targets.

119  
120 **Clinical surveillance data.** The National Notifiable Disease Surveillance System (NNDSS) is a  
121 nationwide collaboration to which all levels of healthcare providers share health information  
122 about nationally notifiable infectious and noninfectious diseases (23). Case reports are compiled  
123 on a weekly basis using uniform case definitions from 50 states, the District of Columbia, New  
124 York City, and 5 territories (American Samoa, Guam, Northern Mariana Islands, Puerto Rico,

125 U.S. Virgin Islands) (23). For this study, we used publicly available information on NNDSS for  
126 *Candida auris* from 11 September 2023 to 1 March 2024 (<https://data.cdc.gov/api/views/x9gk-5huc/rows.csv?accessType=DOWNLOAD>). Dates of case determination varied but included the  
127 following in order of preference: date of disease start, date of diagnosis, date of laboratory  
128 result, date of first report to public health system, or date of state report (24). States which did  
129 not report clinical case data were omitted from analyses. It should be noted that this database is  
130 known to be incomplete as many local jurisdictions do not submit data; additional data on *C.*  
131 *auris* cases or *Candida* cases may be available from other local or regional sources that are not  
132 publicly available or currently updated.

134

135 **Wastewater data: sample collection.** Wastewater measurements were made prospectively as  
136 part of a wastewater surveillance program. Between 11 September 2023 and 1 March 2024,  
137 wastewater samples (either 24-hour composited influent or grab samples from the primary  
138 clarifier, Table S1) were collected by wastewater treatment plant (WWTP) staff using sterile  
139 containers. Samples were typically obtained approximately three times per week and shipped  
140 overnight to the laboratory at 4°C where they were processed immediately with no storage.  
141 Samples were collected from 190 distinct WWTPs across a total of 41 states over the course of  
142 the study period (Figure 1). A total of 13,842 samples were collected and analyzed as part of  
143 this study.

144

145 **Wastewater data: pre-analytical processing.** *C. auris* is expected to be associated with the  
146 solid phase of wastewater based on previous empirical measurements across liquid and solid  
147 phases in wastewater and its size (diameter = 2.5-5 µm), so in this study we made  
148 measurements in the solid phase of wastewater (25, 26). Details of the isolation of solids from  
149 the samples are provided in other peer-reviewed publications (27). In short, samples were  
150 centrifuged to dewater the solids. One aliquot of dewatered solids was used for nucleic-acid

151 extractions and another was used to determine the dry weight of the solids using an oven (27).  
152 Approximately 75 mg of dewatered solids was added per milliliter of DNA/RNA shield (Zymo,  
153 Irvine, CA) spiked with bovine coronavirus vaccine as a positive extraction control. This mixture  
154 of solids and buffer was previously shown to have minimal inhibition.(28) The mixture was  
155 homogenized after the addition of grinding balls, and centrifuged; the supernatant was used  
156 immediately for nucleic-acid extractions. Nucleic-acids were extracted from 6-10 replicate  
157 aliquots of the supernatant using the Chemagic Viral DNA/RNA 300 kit H96 for the Perkin Elmer  
158 Chemagic 360 (Perkin Elmer, Waltham, MA) followed by PCR inhibitor removal with the Zymo  
159 OneStep-96 PCR Inhibitor Removal kit (Zymo Research, Irvine, CA). Whether 6 or 10 replicates  
160 were used is specified in Table S1. The suspension volume entered into the nucleic-acid  
161 extraction process was 300 µl and 50 µl of nucleic-acids were retrieved after the inhibitor  
162 removal kit. Negative extraction controls consisted of BCoV-vaccine spiked DNA/RNA Shield.  
163 Nucleic-acids were used immediately as template in PCR as described next, with no storage.

164  
165 **Wastewater data: analytical processing.** We used droplet digital reverse transcription  
166 polymerase chain reaction (ddRT-PCR) to measure nucleic-acids in wastewater. We measured  
167 pepper mild mottle virus (PMMoV) as an endogenous positive control as concentrations tend to  
168 be extremely elevated in wastewater samples; we measured BCoV as an endogenous, spiked-  
169 in control (28–30). Methods applied to wastewater solids to measure PMMoV and BCoV in a  
170 duplex reaction are provided in detail elsewhere (27). The *C. auris* assay (Table 1) was run in  
171 multiplex using a probe-mixing approach. The exact assays that *C. auris* was multiplexed with  
172 varied slightly over the duration of the project for some of the plants ( information is provided in  
173 Table S2). Multiplexing *C. auris* with these targets did not affect *C. auris* quantification (see SI  
174 Figure S1). The results from those other assays are not provided herein. The PMMoV/BCoV  
175 duplex and *C. auris* multiplex assays were run on 96-well plates. Each 96-well PCR plate of  
176 wastewater samples included PCR positive controls for each target assayed on the plate in 1

177 well, PCR negative no template controls in two wells, and extraction negative controls in two  
178 wells. PCR positive controls consisted of *C. auris* DNA. Each of the 6 or 10 replicate nucleic-  
179 acid extracts were run in their own wells to measure *C. auris*. Two randomly selected or 10  
180 replicate nucleic-acid extracts were run in their own wells to measure PMMoV and BCoV (Table  
181 S1).

182  
183 Table 1. Primers and probes used in this study for detection of *C. auris* nucleic acids. Primers  
184 and probes were purchased from Integrated DNA Technologies (Coralville, IA, USA). The  
185 probes contained fluorescent molecule HEX and quenchers (5' HEX/ZEN/3' IBFQ); HEX,  
186 hexachloro-fluorescein; ZEN, a proprietary internal quencher from Integrated DNA Technologies  
187 (Coralville, IA, USA); and IBFQ, Iowa Black FQ. Amplicon size is 163 basepairs.  
188

|         |                           |
|---------|---------------------------|
| Forward | CGCACATTGCGCCTTGGGGTA     |
| Reverse | GTAGTCCTACCTGATTTGAGGCGAC |
| Probe   | CTTCTCACCAATCTTCGCGGT     |

189  
190  
191 ddRT-PCR was performed on 20- $\mu$ l samples from a 22  $\mu$ l-reaction volume, prepared using 5.5  
192  $\mu$ l of template mixed with 5.5  $\mu$ l of One-Step RT-ddPCR Advanced Kit for Probes (Bio-Rad  
193 1863021), 2.2  $\mu$ l of 200 U/ $\mu$ l Reverse Transcriptase, 1.1  $\mu$ l of 300 mM dithiothreitol (DTT), and  
194 primers and probes mixtures at a final concentration of 900 nM and 250 nM, respectively.  
195 Primer and probes for assays were purchased from Integrated DNA Technologies (IDT, San  
196 Diego, CA) (Table 1). *C. auris* was measured in reactions with undiluted template whereas  
197 PMMoV and BCoV were run on template diluted 1:100 in molecular grade water. It is important  
198 to note that an RT step was used because during the prospective study, we were measuring a  
199 large number of RNA genome viruses. Therefore, the *C. auris* target quantified should be  
200 interpreted as copies of RNA plus DNA.

201  
202 Droplets were generated using the AutoDG Automated Droplet Generator (Bio-Rad, Hercules,  
203 CA). PCR was performed using Mastercycler Pro (Eppendorf, Enfield, CT) with with the



204 following cycling conditions: reverse transcription at 50°C for 60 minutes, enzyme activation at  
205 95°C for 5 minutes, 40 cycles of denaturation at 95°C for 30 seconds and annealing and  
206 extension at 59°C (for *C. auris*) or 56°C (for PMMoV and BCoV) for 30 seconds, enzyme  
207 deactivation at 98°C for 10 minutes then an indefinite hold at 4°C. The ramp rate for  
208 temperature changes were set to 2°C/second and the final hold at 4°C was performed for a  
209 minimum of 30 minutes to allow the droplets to stabilize. Droplets were analyzed using the  
210 QX200 or the QX600 Droplet Reader (Bio-Rad). A well had to have over 10,000 droplets for  
211 inclusion in the analysis. All liquid transfers were performed using the Agilent Bravo (Agilent  
212 Technologies, Santa Clara, CA).

213  
214 Thresholding was done using QuantaSoft™ Analysis Pro Software (Bio-Rad, version 1.0.596)  
215 and QX Manager Software (Bio-Rad, version 2.0). Replicate wells were merged for analysis of  
216 each sample. In order for a sample to be recorded as positive, it had to have at least 3 positive  
217 droplets. Concentrations of RNA targets were converted to concentrations in units of copies  
218 (cp)/g dry weight using dimensional analysis. The total error is reported as standard deviations.  
219 Three positive droplets across 6 merged wells corresponds to a concentration between ~1000  
220 cp/g; the range in values is a result of the range in the equivalent mass of dry solids added to  
221 the wells. Data collected as part of the study are available from the Stanford Digital Repository  
222 (<https://purl.stanford.edu/hv291tt0888>).

223  
224 **Wastewater: Confirmatory analyses.** We selected seven samples (Table S3) with relatively  
225 high concentrations of *C. auris*, as measured above, to test another published *C. auris* assay by  
226 Barber et al. (25) for detecting *C. auris* in wastewater. The assay used by Barber et al. targets  
227 the same region of the *C. auris* genome as the assay in Table 1 but uses different primers and  
228 probes (Table S4) (25). Archived nucleic acid extracts, stored at -80°C, from those samples  
229 were thawed and then run as template using the Barber et al. assay as well as the assay

230 described herein (Table 1). The samples were run in duplex with an assay that targets the N  
231 gene of SARS-CoV-2 (28). *C. auris* was run using a probe labeled with fluorescein amidite  
232 (FAM). The methods described above for the analytical procedures (number of replicate wells,  
233 negative and positive controls) were used.

234  
235 These same seven samples were assayed with and without the reverse transcription step.  
236 Nucleic-acid extracts were thawed and run exactly as described for the prospective study  
237 except that the RT and DTT were not added to the mastermix.

238  
239 We selected a subset of five of the seven samples (Table S3) for Sanger sequencing of the  
240 PCR amplicon. One  $\mu$ l of archived (at  $-80^{\circ}\text{C}$ ) nucleic acid extracts was used as the template in a  
241 50- $\mu$ l PCR reaction prepared according to manufacturer's protocol with Q5<sup>®</sup> High-Fidelity 2X  
242 Master Mix (New England Biolabs, Ipswich, MA) using the primers in Table 2. The thermocycler  
243 program was run at an annealing temperature of  $67^{\circ}\text{C}$  for 30 seconds and extension at  $72^{\circ}\text{C}$  for  
244 30 seconds. *C. auris* DNA was used as a positive control. PCR products were run on a 2%  
245 agarose gel stained with SYBR Safe gel stain (ThermoFisher, Fremont, CA) and amplicons of  
246 the expected size (259 bp) were excised and gel purified using Zymo gel DNA recovery kit  
247 (Irvine, CA). The purified DNA was then sent to Molecular Cloning Laboratories (South San  
248 Francisco, CA) for sanger sequencing. Sequences were downloaded and aligned with *C. auris*  
249 genomes using Snapgene software.

250  
251  
252

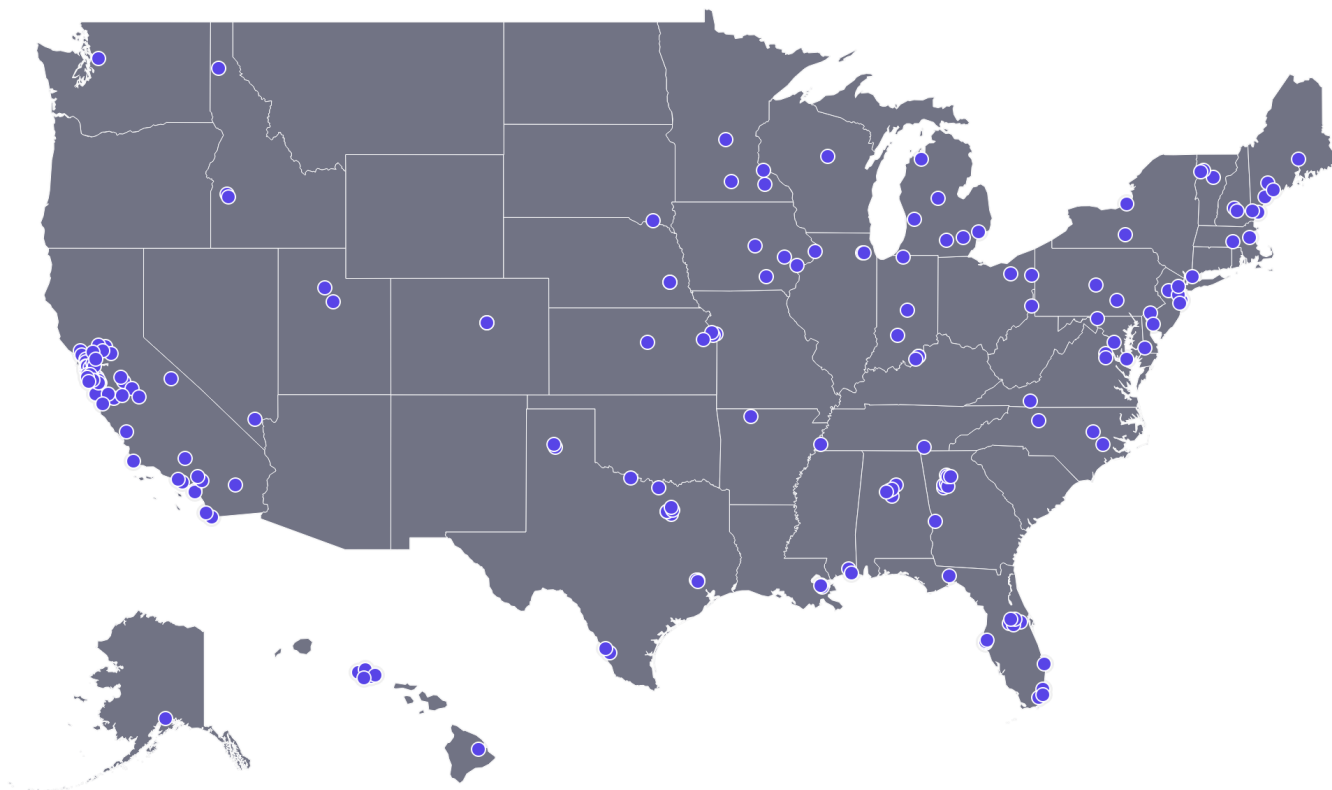

253  
254 **Figure 1.** Location of wastewater treatment plants (WWTPs) with *Candida auris* DNA data  
255 included in the paper. Each blue dot represents the location of a WWTP.

256  
257 **Demographic data.** *C. auris* hospitalizations are most common among older adults (5). We  
258 used 5-year estimates from the 2022 American Community Survey (ACS) at the state level to  
259 identify the median age of states with participating WWTPs (n = 41 states) (31).

260  
261 **Hospitals and nursing homes data.** *C. auris* is particularly a concern in hospitals and nursing  
262 homes (5, 14, 20). We obtained the locations of hospitals and nursing homes in the United  
263 States from the US Department of Homeland Security’s Homeland Infrastructure Foundation-  
264 Level Data (HIFLD) database (<https://gii.dhs.gov/HIFLD>) (32, 33). We selected all types of  
265 hospitals and nursing homes with an “open” status and then determined the number of hospitals  
266 and nursing homes in each sewershed using the Tabulate Intersection geoprocessing tool in  
267 ArcGIS Pro (version 3.1.1). Sewershed boundaries were provided by most WWTPs (n = 115).

268 For WWTPs that did not provide a sewershed (n = 75), we approximated sewershed boundaries  
269 based on the zip codes serviced by the WWTP and USA ZIP Code Boundaries geospatial data  
270 set published by Esri (Source: TomTom, US Postal Service, Esri) (34).

271  
272 **Data analysis.** We made comparisons on the basis of percent of positive detections in  
273 wastewater. Percentage of positive detections of *C. auris* was calculated by counting all positive  
274 observations for a single WWTP and dividing by the total number of observations. Wastewater  
275 measurements in each state were aggregated by Morbidity and Mortality Weekly Report  
276 (MMWR) week, and we calculated the percentage of wastewater measurements that were  
277 positive for *C. auris* each week.

278  
279 Spearman's rank correlation coefficients were used to assess the association between weekly  
280 (MMWR weeks) publicly available NNDSS clinical data and wastewater percent positive  
281 detections (hereafter "detections") of *C. auris* for each state (n=18 states with wastewater and  
282 clinical data). Case data from NNDSS, available on a weekly basis for each state, was used  
283 after adjusting for population (cases per million people, Fig 2a).

284  
285 We tested whether concentrations measured by the assay presented in Table 1 were different  
286 from those measured by the Barber et al. assay using RT-ddPCR on 9 representative samples  
287 (Table S3, Figure S2) (25). We ran the same samples using RT-ddPCR and ddPCR with no RT  
288 step (Table S3, Figure S2). Differences between these controls were assessed using a paired t-  
289 test.

290  
291 We also assessed the relationship between *C. auris* percent positive detections and several  
292 other contextual and demographic factors. We explored seasonality by assessing *C. auris*  
293 detections in wastewater samples collected in fall (defined as Sept 1 to Nov 30) and winter

294 (defined as Dec 1 to Feb 29). We then assessed the association between *C. auris* detections  
295 and age at the state level. We grouped WWTPs by those in states with a median age less than  
296 versus greater than or equal to the national median age (39 years) (31). Lastly, we assessed  
297 the association between *C. auris* detections and hospitals and nursing homes at the sewershed  
298 level. We grouped WWTPs by those with a sewershed intersecting (1) less than versus greater  
299 than or equal to the median number of hospitals among all sewersheds (median: 1 hospital) and  
300 (2) less than versus greater than or equal to the median number of nursing homes among all  
301 sewersheds (median: 7 nursing homes). For seasonality, we compared the percentage of  
302 wastewater samples positive for *C. auris* in each season. For age, hospitals, and nursing  
303 homes, we compared the percentage of wastewater samples that were positive for *C. auris*  
304 across WWTPs in the less than median group versus the greater than or equal to median group.  
305 The null hypothesis tested for each of these variables was that there were no differences  
306 between the two groups.

307  
308 Statistical significance and 95% confidence intervals between the groups described above were  
309 assessed through bootstrapping (35, 36). For each variable and group, a distribution of values  
310 was generated through random sampling with replacement 10,000 times. Significance was then  
311 calculated using the proportion of values below our calculated statistic (i.e. whether the  
312 calculated statistics were above the 95% confidence intervals). This same method was used  
313 when assessing differences between assays (Fig S2) and seasonal differences in detection. In  
314 those cases, grouping was done based on assay and season, respectively.

## 315 **Results**

316

317  
318 **QA/QC.** The *C. auris* assay was found to be sensitive and specific. The *in silico* analysis  
319 indicated no primer or probe sequence was more than an 85% match to off-target matches, and

320 there was no overlap found between combinations of forward primer off-targets, reverse primer  
321 off-targets, and probe off-targets. These factors indicate a high level of specificity in the primer-  
322 probe combination used. The in vitro testing confirmed sensitivity and specificity of the *C. auris*  
323 assay as *C. auris* nucleic-acids were positive and the remaining non-target nucleic-acids were  
324 negative.

325  
326 Results are reported following the Environmental Microbiology Minimal Information (EMMI)  
327 guidelines (see SI and Figure S3).(37) All positive and negative controls performed as expected,  
328 indicating acceptable assay performance. Median (IQR) BCoV recoveries across all wastewater  
329 samples were 1.08 (0.82, 1.43) indicating good recovery across all samples. Recoveries  
330 exceeding 1 are the result of uncertainties in the measurement of BCoV added to the buffer  
331 matrix. PMMoV levels were elevated in all samples indicating lack of gross extraction failures  
332 (median =  $4.8 \times 10^8$  cp/g, min =  $5.0 \times 10^5$  cp/g, max =  $2.02 \times 10^{11}$  cp/g).

333  
334 As a further validation step, *C. auris* was quantified in a subset of samples also using the Barber  
335 et al. assay (Figure S2) (25). Concentrations measured by the two assays closely matched, with  
336 no statistically significant differences ( $p > 0.05$ ). Comparisons between concentrations measured  
337 using RT-ddPCR and ddPCR showed similar results (Figure S2); no significant differences were  
338 found ( $p > 0.05$ ). Additionally, the PCR amplicons obtained using the forward and reverse  
339 primers were sequenced and the sequences matched the *C. auris* genome segment targeted  
340 (Figure S4).

341  
342 **National Overview.** The study period spanned 11 September 2023 to 1 March 2024.  
343 Wastewater data were available from 190 distinct WWTPs in 41 states (Table S1). The number  
344 of WWTPs in these states ranged between 1–57 WWTPs (median: 2 WWTPs), with population  
345 coverage of the sewersheds ranging from 0.13% to 59.5% of the population of each individual

346 state (median: 5.75%). The number of wastewater samples collected and analyzed from  
347 individual WWTPs ranged between 23–173 samples (median: 72 samples) during the study  
348 period. In total, 13,842 wastewater samples were collected and analyzed across all WWTPs  
349 during the study period. *C. auris* concentrations in these samples ranged from below the limit of  
350 detection to 1,456,751 cp/g, with 1.45% (n = 200 samples) of samples above the lowest  
351 detectable concentration. Sixty five (34.21%) WWTPs across 26 states had at least one  
352 detectable *C. auris* concentration during the study period, and the percentage of positive  
353 samples from these WWTPs ranged between 0.58%–46.48% (median: 1.49%). Time series  
354 heatmaps of *C. auris* detections at each of the 190 WWTPs are provided in Figure S5.  
355 Seasonally, 2.00% (n=6754) of observations were positive during autumn (defined as Sep 1 to  
356 Nov 30), and 1.01%(n=7245) of observations were positive during winter (defined as Dec 1 to  
357 Feb 29). This difference was statistically significant when assessed by a bootstrapping  
358 approach (p<0.0001).

359  
360 Clinical data from the National Notifiable Disease Surveillance System (NNDSS) were  
361 downloaded for comparison to wastewater data, and no significant correlations were found  
362 between wastewater detections and population adjusted clinical case rates (Spearman's rho  
363 between -0.10 and 0.23 for the 18 states, all p>0.05). Several states had obvious divergence  
364 between wastewater positivity rates and population adjusted NNDSS clinical case rates (**Figure**  
365 **2**). For example, in Maine, 13.3% of wastewater samples were positive for *C. auris* despite not  
366 reporting any clinical cases during the study period to NNDSS (**Figure 2**). Twelve states which  
367 did not report *C. auris* cases to the NNDSS were found to have positive detections of *C. auris*.  
368 **Figure 3** shows percentage positive detections as a function of population normalized clinical  
369 cases and highlights the limited clinical data available.

370

a. Cases

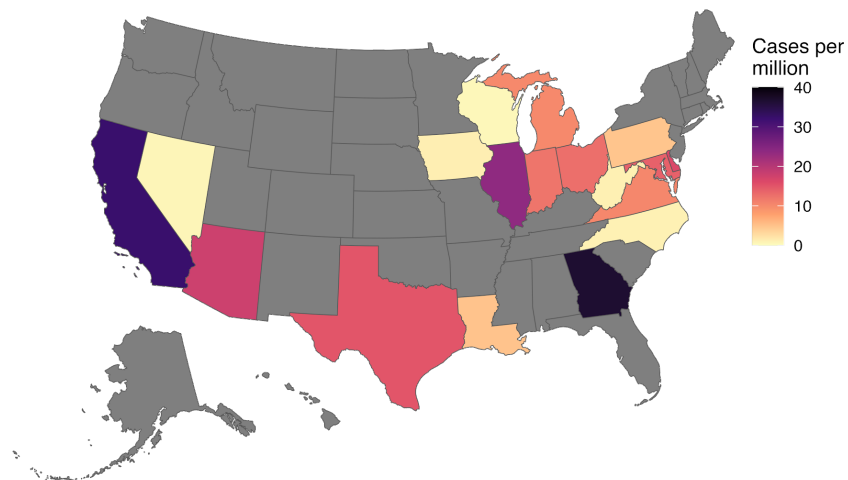

b. Wastewater

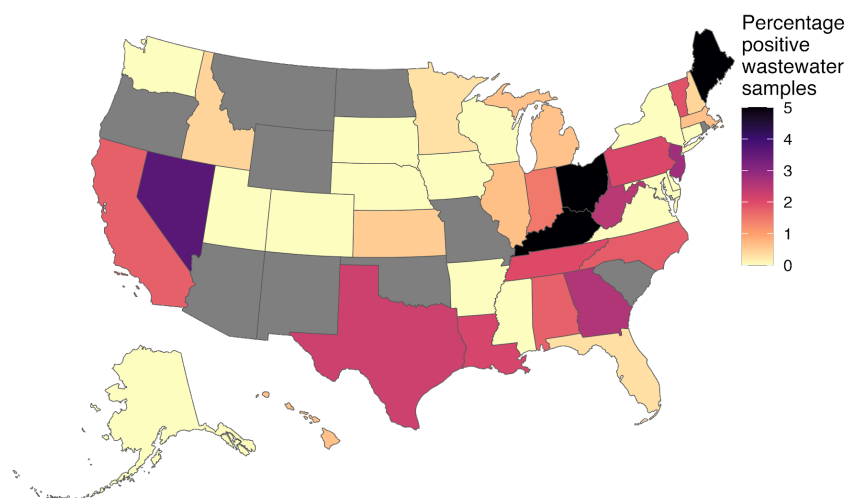

371  
372 **Figure 2:** Map showing percentage of positive wastewater samples and population normalized  
373 case numbers from NNDSS across the United States. **Figure 2a** shows the normalized number  
374 of cases per million in each state as reported to NNDSS during the study period. **Figure 2b**  
375 shows the percentage of positive wastewater samples in each of the states surveilled during the  
376 study period. Yellow represents low normalized values while black represents high normalized  
377 values. Gray states represent areas without available data.  
378  
379



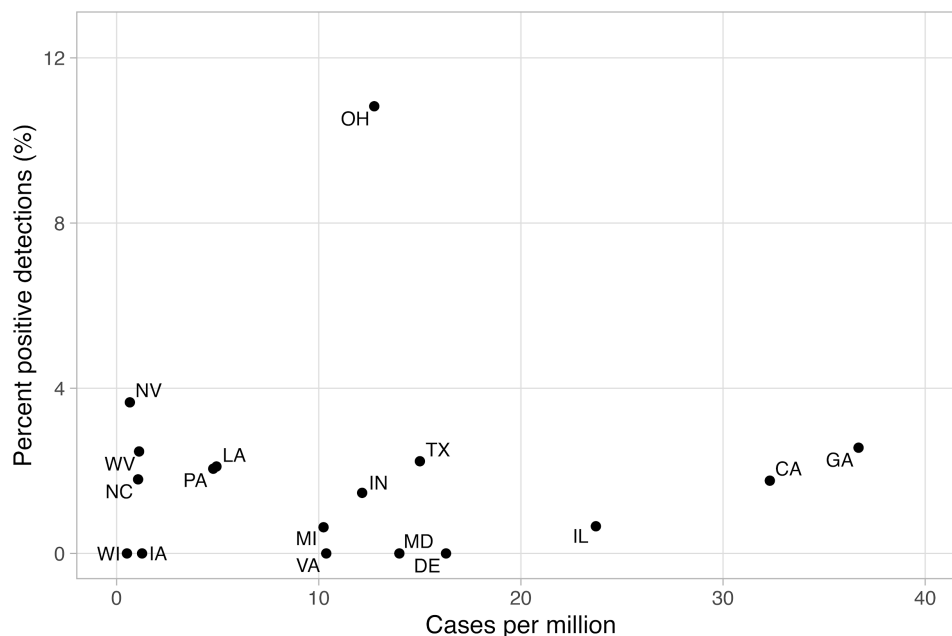

380  
381 **Figure 3.** Comparison of wastewater percent positive detections and total clinical cases as  
382 reported by NNDSS. Only states with clinical data reported to NNDSS are included. Each  
383 labeled point represents the percentage of positive wastewater samples in that state and the  
384 number of cases reported to NNDSS. The state abbreviation is above each data point.  
385

386 **Population demographics and healthcare facility locations and *Candida auris*.**

387 WWTPs were grouped using three separate statistics: median age of the state, number of  
388 hospitals in the sewershed, and number of nursing homes in the sewershed (Fig 4). The median  
389 age in the United States is 39 years as of the latest American Community Survey (ACS) data  
390 (31). Seventy-eight WWTPs were located in a state with a median age at or above the national  
391 median age; 112 WWTPs were located in a state with a median age below the national median  
392 age. As shown in **Figure 4a**, among WWTPs in states with a median age at or above the  
393 national median age, 2.03% (95% CI: [0.80-3.50]) of all wastewater samples were positive for *C.*  
394 *auris*. Among WWTPs in states with a median age below the national median age, 0.83% (95%  
395 CI: [0.34-1.38]) of all wastewater samples were positive for *C. auris*. This difference was  
396 statistically significant when assessed by bootstrapping ( $p < 0.001$ ).

397

398 The median number of hospitals in the sewersheds was 1 hospital (range: 0–74 hospitals).  
399 WWTPs were grouped by whether they contained 0 hospitals (fewer than the median, n = 54) or  
400 1 or more hospitals in their sewersheds (equal to or greater than the median, n = 136). We  
401 found that 1.78% (95% CI: [0.92-2.90], n = 10,019) of samples from WWTPs with at least 1  
402 hospital in their sewersheds were positive for *C. auris* whereas 0.62% (95% CI: [0.34-1.11], n =  
403 3,819) of samples from WWTPs with no hospital in their sewershed were positive for *C. auris*  
404 (**Figure 4b**). This difference was significant when assessed by bootstrapping ( $p < 0.0001$ ).  
405

406 The median number of nursing homes in the 190 sewersheds was 7 (range: 0–420 nursing  
407 homes). WWTPs were grouped by whether they contained 0–6 nursing homes (fewer than the  
408 median, n = 91) or 7 or more nursing homes in their sewersheds (equal to or greater than the  
409 median, n = 99). We found that 1.92% (95% CI: [0.89–3.46], n = 7,544) of samples from  
410 WWTPs with 7 or more nursing homes in their sewersheds were positive for *C. auris* whereas  
411 0.87% (95% CI: [0.47–1.47], n = 6,294) of samples from WWTPs with 0–7 nursing homes in  
412 their sewersheds were positive for *C. auris* (**Figure 4c**). This difference was significant when  
413 assessed by bootstrapping ( $p < 0.001$ ).  
414

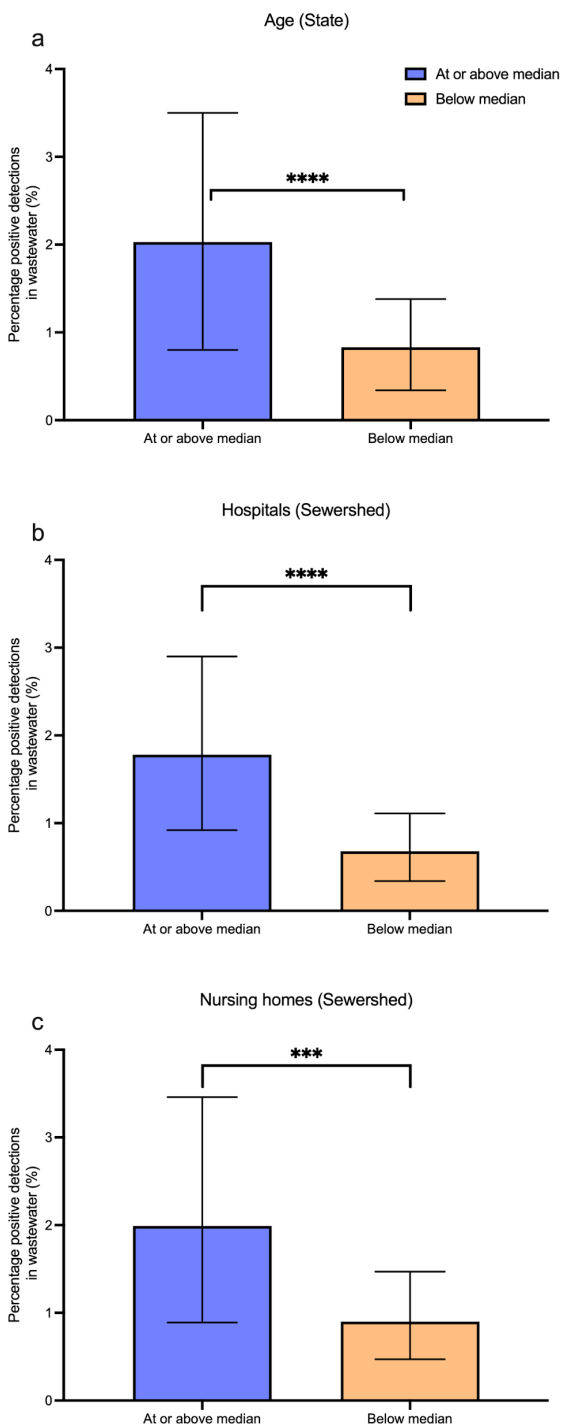

415  
416 **Figure 4.** Comparison of wastewater detections across different groups. \*\*\* indicates  $p < 0.001$ ,  
417 \*\*\*\* indicates  $p < 0.0001$ . **Figure 4a** shows the percentage of positive samples for states at or  
418 above the median age compared to those below. **Figure 4b** shows the percentage of positive  
419 samples when grouped by number of hospitals at the sewershed level. **Figure 4c** shows the  
420 same statistic when grouped by number of nursing homes, again at the sewershed level. Error  
421 bars represent 95% confidence intervals derived from the bootstrapping approach.  
422

423

## 424 Discussion

425

426 Previous studies at the sewershed scale have shown that detection of *C. auris* in wastewater is  
427 indicative of ongoing outbreaks in the contributing population (19, 25). To our knowledge, this  
428 study represents the first nationwide wastewater monitoring effort of *C. auris* and comparison to  
429 national clinical case data (23). We first demonstrate the sensitivity and specificity of the assay  
430 used in this study through comparisons to published assays, sequencing (Figure S2, S4), and in  
431 silico analyses. The widespread detection of *C. auris* in wastewater suggests a significant gap in  
432 clinical case data reported to the NNDSS. Indeed, it is known that many local jurisdictions do  
433 not provide data for inclusion in NNDSS. We found that *C. auris* detections are more frequent in  
434 states with older populations and in sewersheds with higher numbers of nursing homes and  
435 hospitals. These findings are consistent with *C. auris* infections being more common in older,  
436 more susceptible populations and further support the assertion that clinical case data may be  
437 incomplete.

438

439 *C. auris* has gone from initial detection in the United States in 2013 to being declared an  
440 “Urgent” and notifiable pathogen in 2019 by the United States (CDC) (14, 20, 38). The rate of  
441 testing volume and clinical positives has rapidly increased, with 17 states identifying their first *C.*  
442 *auris* cases between 2019 to 2021 (14). Despite this, clinical testing for *C. auris* is far from  
443 ubiquitous and not conducted uniformly across the United States (14, 39). On-site PCR testing  
444 of clinical specimens is rare, and samples often have to be sent to public health or reference  
445 laboratories, further increasing the cost of testing and the turnaround time before the data  
446 reaches public health officials (39). Detections of *C. auris* nucleic-acids in wastewater collected  
447 throughout the United States demonstrate a need for increased clinical testing and reporting

448 capacity, and the capability of wastewater testing to serve as a sentinel surveillance mechanism  
449 for emerging pathogens.

450

451 *C. auris* is an opportunistic pathogen that often infects the elderly and immunocompromised  
452 within long-term healthcare facilities (10, 20, 40). Following our detection of *C. auris*, we  
453 investigated potential demographics and healthcare facilities related to its pathology using data  
454 from the ACS and US Department of Homeland Security's HIFLD database (31, 41). We  
455 analyzed age, number of hospitals, and number of nursing homes as plausible factors impacting  
456 the presence of *C. auris* within a sewershed or state. We found significant differences between  
457 the percentage of positive detections of *C. auris* in states with a median age less than versus  
458 greater than or equal to the national median age. Similarly, we found significant differences  
459 between the percentage of positive detections of *C. auris* in sewersheds with less than versus  
460 greater than or equal to the median number of hospitals and nursing homes. States with a  
461 population above the national median age were more than three times as likely to detect *C.*  
462 *auris* in a given wastewater sample. At the sewershed level, locations with 1 or more hospitals  
463 had three times the amount of *C. auris* detections than locations with no hospitals. Similarly,  
464 sewersheds with greater than or equal to the median number of nursing homes had over twice  
465 as many detections of *C. auris* as those with fewer than the median number of nursing homes.  
466 These findings are consistent with the known epidemiology of *C. auris*, as infected patients'  
467 median age is 68 and outbreaks are prevalent in long-term healthcare facilities and nursing  
468 homes (5, 14). The presence of an at-risk population appears to be strongly associated with *C.*  
469 *auris* wastewater detections, suggesting public health efforts are appropriately focused on these  
470 at-risk populations.

471

472 Significant steps were taken to ensure the validity of detection results. A similar assay was used  
473 by Barber et al. for the detection of *C. auris* in southern Nevada during an outbreak (25). We

474 tested nine samples from three different states using both the assay presented in this study and  
475 the one used by Barber et al. (25). No statistically significant difference was found between the  
476 two assays, which both targeted the same region of an internally transcribed spacer region. Our  
477 assay was further validated using a subset of 5 of these 9 samples through sequencing. The  
478 amplicons generated by our forward and reverse primers independently and accurately matched  
479 the reference amplicon, indicating specific amplification (Figure S4). Together, these results  
480 demonstrate that the assay used in this study is highly specific. Finally, we used an RT-PCR  
481 assay to detect *C. auris* which means the assay should detect both RNA and DNA. We  
482 measured some samples using both RT-PCR and PCR and the results indicated that most of  
483 the target nucleic acids in those samples were DNA. This was somewhat surprising since we  
484 expect the DNA target (located in the region of the genome that encodes ribosomal RNA)  
485 should be transcribed into RNA by *C. auris*. Future work will need to be done to further  
486 investigate the relative proportion of target RNA versus DNA *C. auris* targets in wastewater.  
487 Regardless, the use of an RT-PCR assay, allowing detection of both RNA and DNA, should  
488 increase the sensitivity of the assay (by detecting both nucleic-acids) yet perhaps complicate  
489 interpretation of measured concentrations. For this reason, we only use the data in  
490 presence/absence format.

491  
492 Overall, our results demonstrate that *C. auris* wastewater surveillance can provide timely  
493 information on geographical distribution and help identify at-risk populations; wastewater data  
494 can be available within 24-48 hours of sample collection. As an emerging disease, clinical  
495 testing for *C. auris* largely depends on shipping samples to public health laboratories (7, 13, 14).  
496 Wastewater surveillance can help fill this gap for municipalities and states without the capital to  
497 fund testing systems, providing community level information as to the prevalence, and more  
498 importantly, the spread of *C. auris*. These data are critical to public health responses,  
499 particularly when dealing with pathogens that do not or did not have robust clinical testing

500 systems such as Dengue virus, SARS-CoV-2, and *C. auris* (14, 16, 17, 39). *C. auris* wastewater  
501 surveillance data can then be used to implement stricter screening protocols, cleaning  
502 protocols, and other non-pharmaceutical interventions that can prevent the spread of illness  
503 amongst vulnerable populations (9, 10, 20).

504 There are limitations associated with this study. Importantly, the availability of clinical data was  
505 limited due to the recent classification in 2018 of *C. auris* as a notifiable disease, making in-  
506 depth analyses of associations between wastewater detections and clinical data on infections  
507 unfeasible. In addition, it is well understood that the NNDSS database may not contain all the  
508 information on *C. auris* positive cases in the United States; local jurisdictions may have local  
509 data to inform public health response to infections and those data were not available for this  
510 work. Local jurisdictions are encouraged to use these wastewater data to compare to their local  
511 case rates. Further, wastewater sampling was not uniform across the United States or within  
512 individual states, which could introduce biases into the analyses. Within the demographic data  
513 available at the sewershed level, information was limited as to the size of nursing homes and  
514 hospitals, which might be important factors controlling associations with wastewater data on *C.*  
515 *auris*. Lastly, we were unable to link specific wastewater concentrations to population-level  
516 incidence. Further experiments are necessary to understand the shedding patterns of *C. auris* in  
517 human excretions as to provide this direct link to disease occurrence in the contributing  
518 population. These experiments are particularly important to the determination of the significance  
519 of wastewater detections, as *C. auris* contributions to wastewater could potentially be from  
520 colonized individuals or individuals with acute infection. Finally, an additional limitation is that we  
521 cannot rule out the potential for *C. auris* detections in wastewater to be from zoonotic or  
522 environmental sources. Detections have been shown to match underlying expected  
523 demographic indicators such as age and presence of nursing homes, further lending credence  
524 to the source of detections being human. While there is no evidence to support the possibility of  
525 zoonotic or environmental contributions of *C. auris* nucleic-acids to wastewater, further research

526 is needed to see if such evidence might exist. There have been case reports of *C. auris*  
527 infections in canines, and *Candida spp.* have been detected using culture and other molecular  
528 methods from biofilms in sewer pipes (42–45). It should be noted that wastewater detection of  
529 *Candida auris* collected at the wastewater treatment plant scale does not imply community-  
530 spread of the pathogen, but is consistent with its presence in one or more individuals within the  
531 sewershed.

532

533 **Acknowledgements.** We acknowledge all the wastewater treatment plant staff who provided  
534 samples for this project.

535



536  
537  
538  
539  
540  
541  
542  
543  
544  
545  
546  
547  
548  
549  
550  
551  
552  
553  
554  
555  
556  
557  
558  
559  
560  
561  
562  
563

## References

1. Ageing and health. <https://www.who.int/news-room/fact-sheets/detail/ageing-and-health>. Retrieved 17 January 2024.
2. Hospital-Acquired Infections - ClinicalKey. <https://www.clinicalkey.com/#!/content/playContent/1-s2.0-S0039610911001514>. Retrieved 16 January 2024.
3. Serra-Burriel M, Keys M, Campillo-Artero C, Agodi A, Barchitta M, Gikas A, Palos C, López-Casasnovas G. 2020. Impact of multi-drug resistant bacteria on economic and clinical outcomes of healthcare-associated infections in adults: Systematic review and meta-analysis. *PLOS ONE* 15:e0227139.
4. Ahmad S, Alfouzan W. 2021. Candida auris: Epidemiology, Diagnosis, Pathogenesis, Antifungal Susceptibility, and Infection Control Measures to Combat the Spread of Infections in Healthcare Facilities. *Microorganisms* 9:807.
5. Benedict K, Forsberg K, Gold JAW, Baggs J, Lyman M. Candida auris—Associated Hospitalizations, United States, 2017–2022 - Volume 29, Number 7—July 2023 - Emerging Infectious Diseases journal - CDC <https://doi.org/10.3201/eid2907.230540>.
6. Lone SA, Ahmad A. 2019. Candida auris—the growing menace to global health. *Mycoses* 62:620–637.
7. 2023. Surveillance for Candida auris | Candida auris | Fungal Diseases | CDC. <https://www.cdc.gov/fungal/candida-auris/c-auris-surveillance.html>. Retrieved 17 January 2024.
8. Sengupta S, Marimuthu K, Stewardson A, Harbarth S, Durante A, Singh S. 2020. Challenges in Identification of Candida auris in Hospital Laboratories: Comparison Between HIC and LMIC. *Infect Control Hosp Epidemiol* 41:s158–s158.

- 564 9. Piedrahita CT, Cadnum JL, Jencson AL, Shaikh AA, Ghannoum MA, Donskey CJ. 2017.  
565 Environmental Surfaces in Healthcare Facilities are a Potential Source for Transmission of  
566 *Candida auris* and Other *Candida* Species. *Infect Control Hosp Epidemiol* 38:1107–1109.
- 567 10. Welsh RM, Bentz ML, Shams A, Houston H, Lyons A, Rose LJ, Litvintseva AP. 2017.  
568 Survival, Persistence, and Isolation of the Emerging Multidrug-Resistant Pathogenic Yeast  
569 *Candida auris* on a Plastic Health Care Surface. *J Clin Microbiol* 55:2996–3005.
- 570 11. US EPA O. 2020. List P: Antimicrobial Products Registered with EPA for Claims Against  
571 *Candida Auris*. Overviews and Factsheets. [https://www.epa.gov/pesticide-registration/list-](https://www.epa.gov/pesticide-registration/list-p-antimicrobial-products-registered-epa-claims-against-candida-auris)  
572 [p-antimicrobial-products-registered-epa-claims-against-candida-auris](https://www.epa.gov/pesticide-registration/list-p-antimicrobial-products-registered-epa-claims-against-candida-auris). Retrieved 25  
573 January 2024.
- 574 12. Karmarkar EN, O'Donnell K, Prestel C, Forsberg K, Gade L, Jain S, Schan D, Chow N,  
575 McDermott D, Rossow J, Toda M, Ruiz R, Hun S, Dale JL, Gross A, Maruca T, Glowicz J,  
576 Brooks R, Bagheri H, Nelson T, Gualandi N, Khwaja Z, Horwich-Scholefield S, Jacobs J,  
577 Cheung M, Walters M, Jacobs-Slifka K, Stone ND, Mikhail L, Chaturvedi S, Klein L,  
578 Vagnone PS, Schneider E, Berkow EL, Jackson BR, Vallabhaneni S, Zahn M, Epton E.  
579 2021. Rapid Assessment and Containment of *Candida auris* Transmission in Postacute  
580 Care Settings—Orange County, California, 2019. *Ann Intern Med* 174:1554–1562.
- 581 13. 2023. Tracking *Candida auris* | *Candida auris* | Fungal Diseases | CDC.  
582 <https://www.cdc.gov/fungal/candida-auris/tracking-c-auris.html>. Retrieved 17 January  
583 2024.
- 584 14. Worsening Spread of *Candida auris* in the United States, 2019 to 2021 | *Annals of Internal*  
585 *Medicine*. <https://www.acpjournals.org/doi/full/10.7326/M22-3469>. Retrieved 17 January  
586 2024.
- 587 15. Boehm AB, Hughes B, Doung D, Chan-Herur V, Buchman A, Wolfe MK, White BJ. 2022.  
588 Wastewater surveillance of human influenza, metapneumovirus, parainfluenza, respiratory  
589 syncytial virus (RSV), rhinovirus, and seasonal coronaviruses during the COVID-19

- 590 pandemic. preprint. *Infectious Diseases (except HIV/AIDS)*.
- 591 16. Peccia J, Zulli A, Brackney DE, Grubaugh ND, Kaplan EH, Casanovas-Massana A, Ko AI,  
592 Malik AA, Wang D, Wang M, Warren JL, Weinberger DM, Arnold W, Omer SB. 2020.  
593 Measurement of SARS-CoV-2 RNA in wastewater tracks community infection dynamics.  
594 *Nat Biotechnol* 38:1164–1167.
- 595 17. Wolfe MK, Paulos AH, Zulli A, Duong D, Shelden B, White BJ, Boehm AB. 2024.  
596 Wastewater Detection of Emerging Arbovirus Infections: Case Study of Dengue in the  
597 United States. *Environ Sci Technol Lett* 11:9–15.
- 598 18. Pacilli M, Kerins JL, Clegg WJ, Walblay KA, Adil H, Kemble SK, Xydis S, McPherson TD,  
599 Lin MY, Hayden MK, Froilan MC, Soda E, Tang AS, Valley A, Forsberg K, Gable P,  
600 Moulton-Meissner H, Sexton DJ, Jacobs Slifka KM, Vallabhaneni S, Walters MS, Black  
601 SR. 2020. Regional Emergence of *Candida auris* in Chicago and Lessons Learned From  
602 Intensive Follow-up at 1 Ventilator-Capable Skilled Nursing Facility. *Clin Infect Dis*  
603 71:e718–e725.
- 604 19. Babler K, Sharkey M, Arenas S, Amirali A, Beaver C, Comerford S, Goodman K, Grills G,  
605 Holung M, Kobetz E, Laine J, Lamar W, Mason C, Pronty D, Reding B, Schürer S,  
606 Schaefer Solle N, Stevenson M, Vidović D, Solo-Gabriele H, Shukla B. 2023. Detection of  
607 the clinically persistent, pathogenic yeast spp. *Candida auris* from hospital and municipal  
608 wastewater in Miami-Dade County, Florida. *Sci Total Environ* 898:165459.
- 609 20. 2023. Infection Prevention and Control for *Candida auris* | *Candida auris* | Fungal  
610 Diseases | CDC. <https://www.cdc.gov/fungal/candida-auris/c-auris-infection-control.html>.  
611 Retrieved 25 January 2024.
- 612 21. Kordalewska M, Zhao Y, Lockhart SR, Chowdhary A, Berrio I, Perlin DS. 2017. Rapid and  
613 Accurate Molecular Identification of the Emerging Multidrug-Resistant Pathogen *Candida*  
614 *auris*. *J Clin Microbiol* 55:2445–2452.
- 615 22. BLAST: Basic Local Alignment Search Tool. <https://blast.ncbi.nlm.nih.gov/Blast.cgi>.

- 616 Retrieved 29 February 2024.
- 617 23. National Notifiable Diseases Surveillance System (NNDSS) - Healthy People 2030 |  
618 health.gov. [https://health.gov/healthypeople/objectives-and-data/data-sources-and-](https://health.gov/healthypeople/objectives-and-data/data-sources-and-methods/data-sources/national-notifiable-diseases-surveillance-system-nndss)  
619 [methods/data-sources/national-notifiable-diseases-surveillance-system-nndss](https://health.gov/healthypeople/objectives-and-data/data-sources-and-methods/data-sources/national-notifiable-diseases-surveillance-system-nndss). Retrieved  
620 26 January 2024.
- 621 24. Weston E (CDC/OID/NCIRD). Guidance on classifying STD case reports into MMWR  
622 week.
- 623 25. Barber C, Crank K, Papp K, Innes GK, Schmitz BW, Chavez J, Rossi A, Gerrity D. 2023.  
624 Community-Scale Wastewater Surveillance of *Candida auris* during an Ongoing Outbreak  
625 in Southern Nevada. *Environ Sci Technol* 57:1755–1763.
- 626 26. Roldan-Hernandez L, Boehm AB. 2023. Adsorption of Respiratory Syncytial Virus,  
627 Rhinovirus, SARS-CoV-2, and F+ Bacteriophage MS2 RNA onto Wastewater Solids from  
628 Raw Wastewater. *Environ Sci Technol* 57:13346–13355.
- 629 27. Boehm A, Wolfe M, Wigginton K, Bidwell A, White B, Duong D, Hughes B, Chan-Herur V,  
630 Naughton C, Bischel H. 2023. Human viral nucleic acids concentrations in wastewater  
631 solids from Central and Coastal California, USA. Boehm Res Group Stanf.
- 632 28. Human viral nucleic acids concentrations in wastewater solids from Central and Coastal  
633 California USA | Scientific Data. [https://www-nature-](https://www-nature-com.stanford.idm.oclc.org/articles/s41597-023-02297-7)  
634 [com.stanford.idm.oclc.org/articles/s41597-023-02297-7](https://www-nature-com.stanford.idm.oclc.org/articles/s41597-023-02297-7). Retrieved 14 October 2023.
- 635 29. McClary-Gutierrez JS, Aanderud ZT, Al-faliti M, Duvallet C, Gonzalez R, Guzman J, Holm  
636 RH, Jahne MA, Kantor RS, Katsivelis P, Kuhn KG, Langan LM, Mansfeldt C, McLellan SL,  
637 Grijalva LMM, Murnane KS, Naughton CC, Packman AI, Paraskevopoulos S, Radniecki  
638 TS, Roman FA, Shrestha A, Stadler LB, Steele JA, Swalla BM, Vikesland P, Wartell B,  
639 Wilusz CJ, Wong JCC, Boehm AB, Halden RU, Bibby K, Vela JD. 2021. Standardizing  
640 data reporting in the research community to enhance the utility of open data for SARS-  
641 CoV-2 wastewater surveillance. *Environ Sci Water Res Technol* 7:1545–1551.

- 642 30. Rosario K, Symonds EM, Sinigalliano C, Stewart J, Breitbart M. 2009. Pepper mild mottle  
643 virus as an indicator of fecal pollution. *Appl Environ Microbiol* 75:7261–7267.
- 644 31. U.S. Census Bureau. S0101: Age and Sex - Census Bureau Table. *Am Community Surv*  
645 *ACS 1-Year Estim Subj Tables Table S0101*.  
646 [https://data.census.gov/table/ACSST1Y2022.S0101?q=median%20age%20by%20state&g](https://data.census.gov/table/ACSST1Y2022.S0101?q=median%20age%20by%20state&g=010XX00US)  
647 [=010XX00US](https://data.census.gov/table/ACSST1Y2022.S0101?q=median%20age%20by%20state&g=010XX00US). Retrieved 12 February 2024.
- 648 32. Nursing Homes. [https://hifld-geoplatform.hub.arcgis.com/datasets/geoplatform::nursing-](https://hifld-geoplatform.hub.arcgis.com/datasets/geoplatform::nursing-homes/about)  
649 [homes/about](https://hifld-geoplatform.hub.arcgis.com/datasets/geoplatform::nursing-homes/about). Retrieved 13 March 2024.
- 650 33. Hospitals. <https://hifld-geoplatform.hub.arcgis.com/datasets/geoplatform::hospitals/about>.  
651 Retrieved 13 March 2024.
- 652 34. USA ZIP Code Boundaries.  
653 [https://hub.arcgis.com/datasets/d6f7ee6129e241cc9b6f75978e47128b\\_0/about](https://hub.arcgis.com/datasets/d6f7ee6129e241cc9b6f75978e47128b_0/about). Retrieved  
654 6 March 2024.
- 655 35. Efron B. 1979. Bootstrap Methods: Another Look at the Jackknife. *Ann Stat* 7:1–26.
- 656 36. DICICCIO T, EFRON B. 1992. More accurate confidence intervals in exponential families.  
657 *Biometrika* 79:231–245.
- 658 37. Borchardt MA, Boehm AB, Salit M, Spencer SK, Wigginton KR, Noble RT. 2021. The  
659 Environmental Microbiology Minimum Information (EMMI) Guidelines: qPCR and dPCR  
660 Quality and Reporting for Environmental Microbiology. *Environ Sci Technol* 55:10210–  
661 10223.
- 662 38. Centers for Disease Control and Prevention (U.S.). 2019. Antibiotic resistance threats in  
663 the United States, 2019. Centers for Disease Control and Prevention (U.S.).
- 664 39. Arenas S, Patel S, Seely SO, Pagan PP, Warde PR, Tamrakar LJ, Parekh DJ, Ferreira T,  
665 Zhou Y, Gershengorn HB, Shukla BS. 2023. Operational impact of decreased turnaround  
666 times for *Candida auris* screening tests in a tertiary academic medical center. *Antimicrob*  
667 *Steward Healthc Epidemiol ASHE* 3:e176.

- 668 40. Schwartz IS, Dingle TC. 2019. *Candida auris*. CMAJ Can Med Assoc J 191:E865.
- 669 41. HIFLD Open. <https://hifld-geoplatform.hub.arcgis.com/pages/hifld-open>. Retrieved 19  
670 March 2024.
- 671 42. White TC, Esquivel BD, Rouse Salcido EM, Schweiker AM, dos Santos AR, Gade L, Petro  
672 E, KuKanich B, KuKanich KS. 2024. *Candida auris* detected in the oral cavity of a dog in  
673 Kansas. mBio 15:e03080-23.
- 674 43. Yadav A, Wang Y, Jain K, Panwar VAR, Kaur H, Kasana V, Xu J, Chowdhary A. 2023.  
675 *Candida auris* in Dog Ears. J Fungi 9:720.
- 676 44. Cavalheiro M, Teixeira MC. 2018. *Candida* Biofilms: Threats, Challenges, and Promising  
677 Strategies. Front Med 5:28.
- 678 45. Nobile CJ, Johnson AD. 2015. *Candida albicans* Biofilms and Human Disease. Annu Rev  
679 Microbiol 69:71–92.

680  
681  
682  
683  
684  
685  
686  
687  
688
